# Supplementary material for: Multiple Pleomorphic Tetramers of Thermostable Direct Hemolysin from Grimontia hollisae in Exerting Hemolysis and Membrane Binding
Source: PubMed Central journal article supplement (PMC6614540; doi:10.1038/s41598-019-46354-x), 2019-07-08
Supplement: 41598_2019_46354_MOESM1_ESM.pdf [file 41598_2019_46354_MOESM1_ESM.pdf]

## Supplementary Data for:

### Multiple Pleomorphic Tetramers of Thermostable Direct Hemolysin from *Grimontia hollisae* in Exerting Hemolysis and Membrane Binding

Yu-Kuo Wang<sup>a</sup>, Sheng-Cih Huang<sup>a</sup>, Chin-Yuan Chang<sup>a</sup>, Wan-Ting Huang<sup>a</sup>, Man-Jun Liao<sup>a</sup>, Bak-Sau Yip<sup>c</sup>,  
Feng-Pai Chou<sup>a</sup>, Thomas Tien-Hsiung Li<sup>d\*</sup>, and Tung-Kung Wu<sup>a,b\*</sup>

<sup>a</sup>Department of Biological Science and Technology, National Chiao Tung University, Hsin-Chu 30010,  
Taiwan, Republic of China

<sup>b</sup>Center for Emergent Functional Matter Science, National Chiao Tung University, 1001 Ta-Hsueh Rd.,  
Hsinchu 30010, Taiwan, Republic of China

<sup>c</sup>Department of Neurology, National Taiwan University Hospital, Hsin-Chu, 30059, Taiwan, Republic of  
China

<sup>d</sup>Graduate Institute of Biochemistry, National Chung Hsing University, Taichung, 40227 Taiwan, Republic  
of China

**\* To whom correspondence should be addressed:**

E-mail: tkwml1@mail.nctu.edu.tw (T. K. Wu)

Fax: +886-3-5725700

Tel: +886-3-5712121-56917

E-mail: lithomas@dragon.nchc.edu.tw (Thomas T. H. Li)

Fax: +886-4-22853487

Tel: +886-4-22840468

**Fig. S1** Superposition of the overall structures of the TDH tetramers (Gh-TDH Oligomer-I) between *G. hollisae* (green, PDB entry 4WX3) and *V. parahaemolyticus* (red, PDB entry 3A57). The spheres colored in orange marked the position of the *N*-terminal Gly<sup>12</sup> for each TDH monomer. The Vp-TDH tetramer were generated by applying crystallographic symmetries (Space group  $I_4$ ) on the coordinates of the published Vp-TDH monomeric structure.

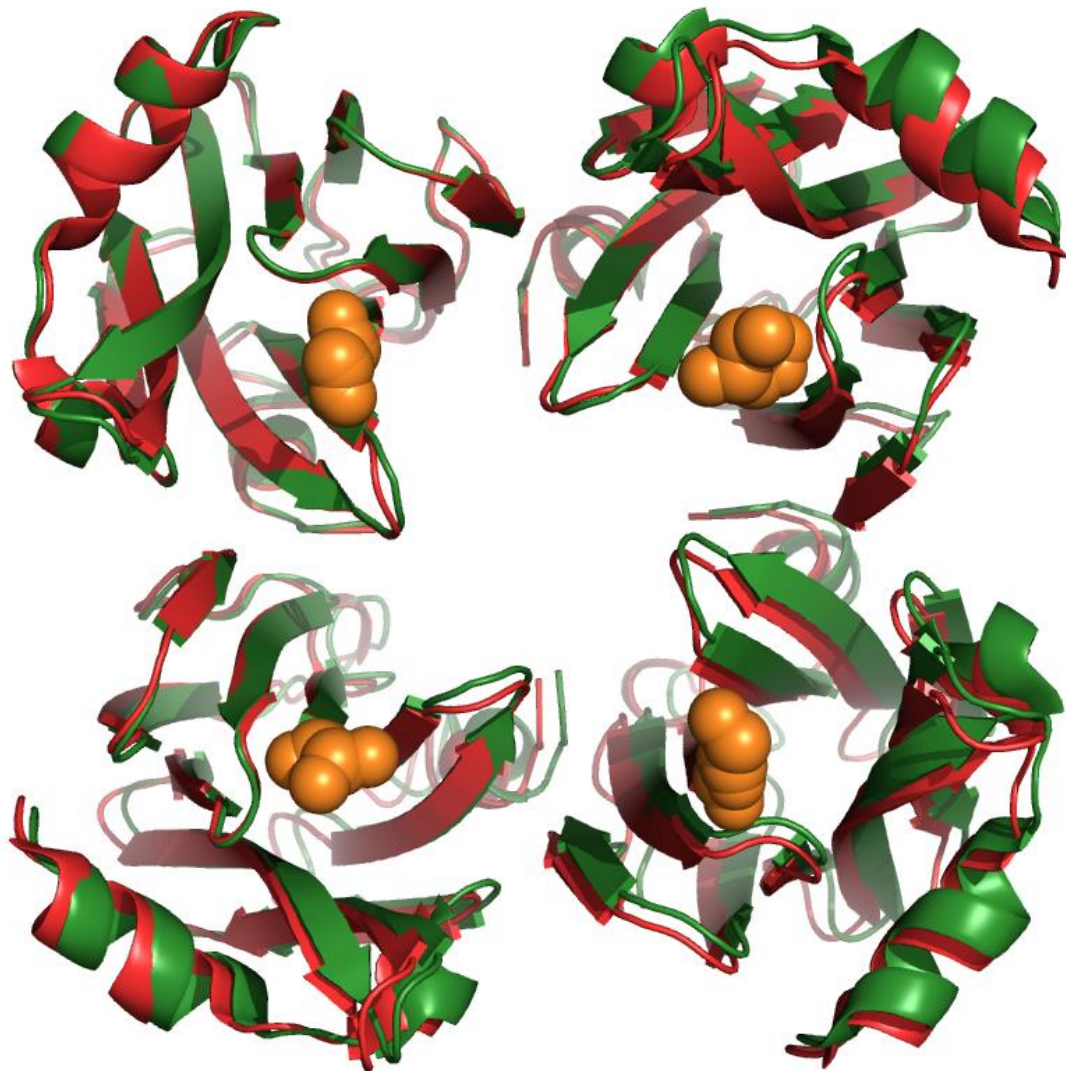

**Fig. S2.** Illustration of residues of Gh-TDH involved in protomer-protomer interactions. (A) The crystal packing pattern corresponds to the Gh-TDH-I oligomer, and protomer-protomer interactions in (B) Oligomer-I, (C) Oligomer-II, and (D) Oligomer-III.

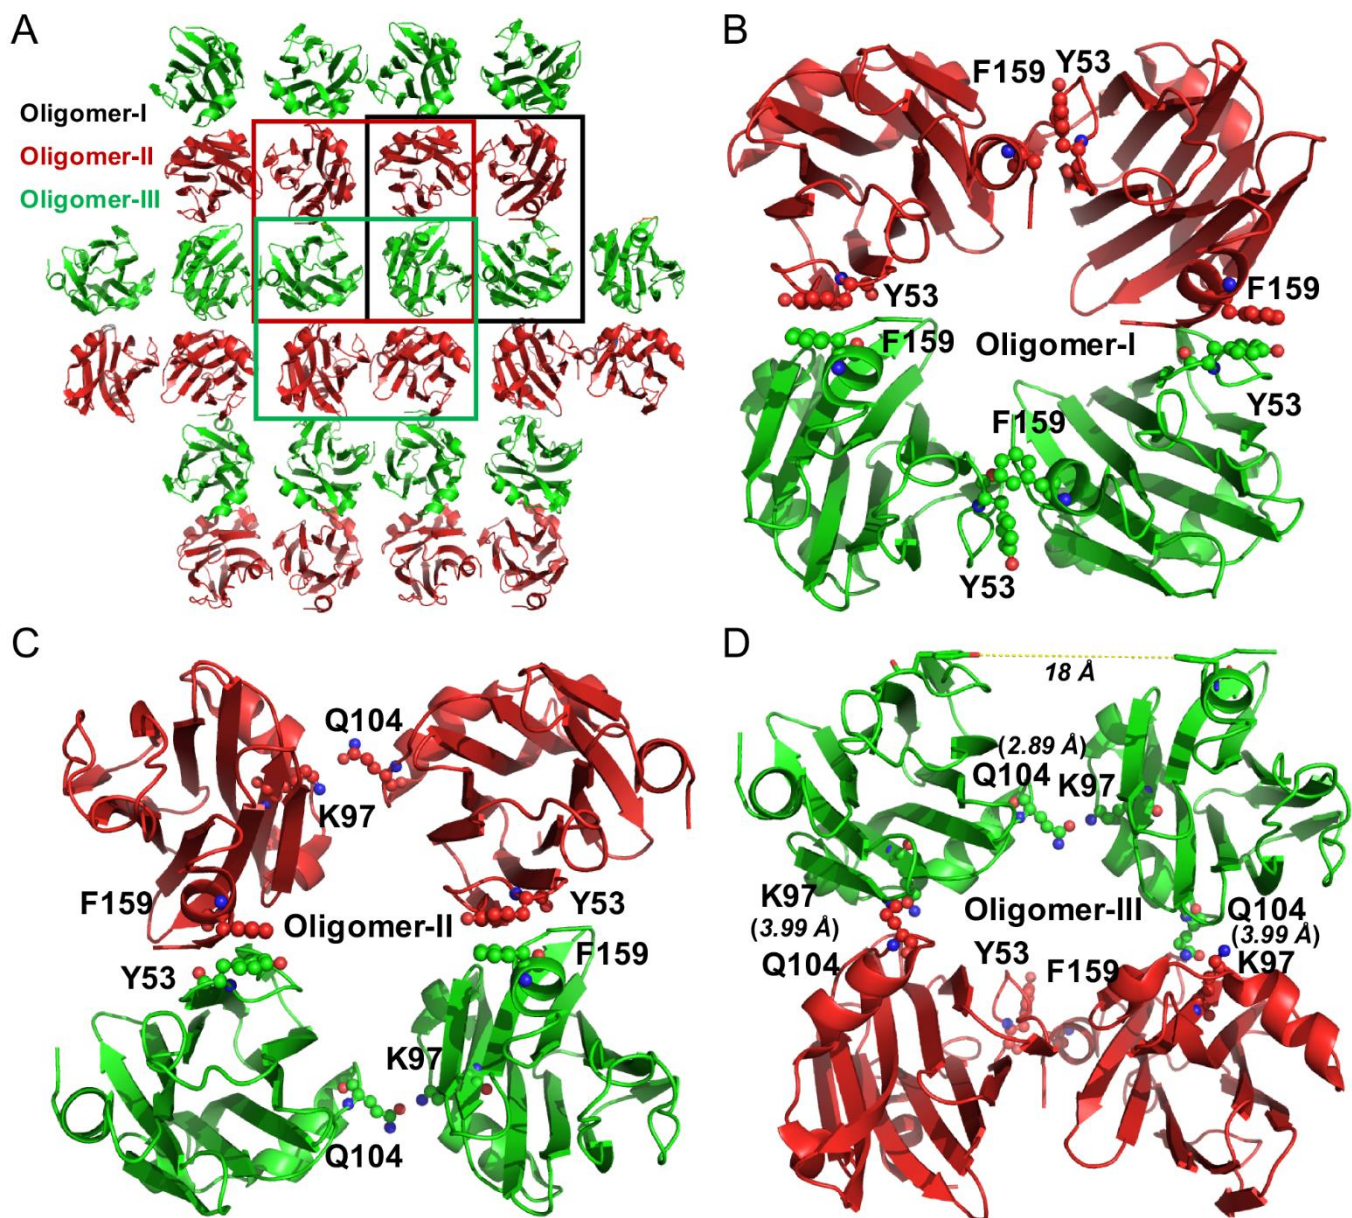

**Fig. S3.** Flow cytometry analysis of erythrocytes binding of wild-type and mutated Gh-TDHs.

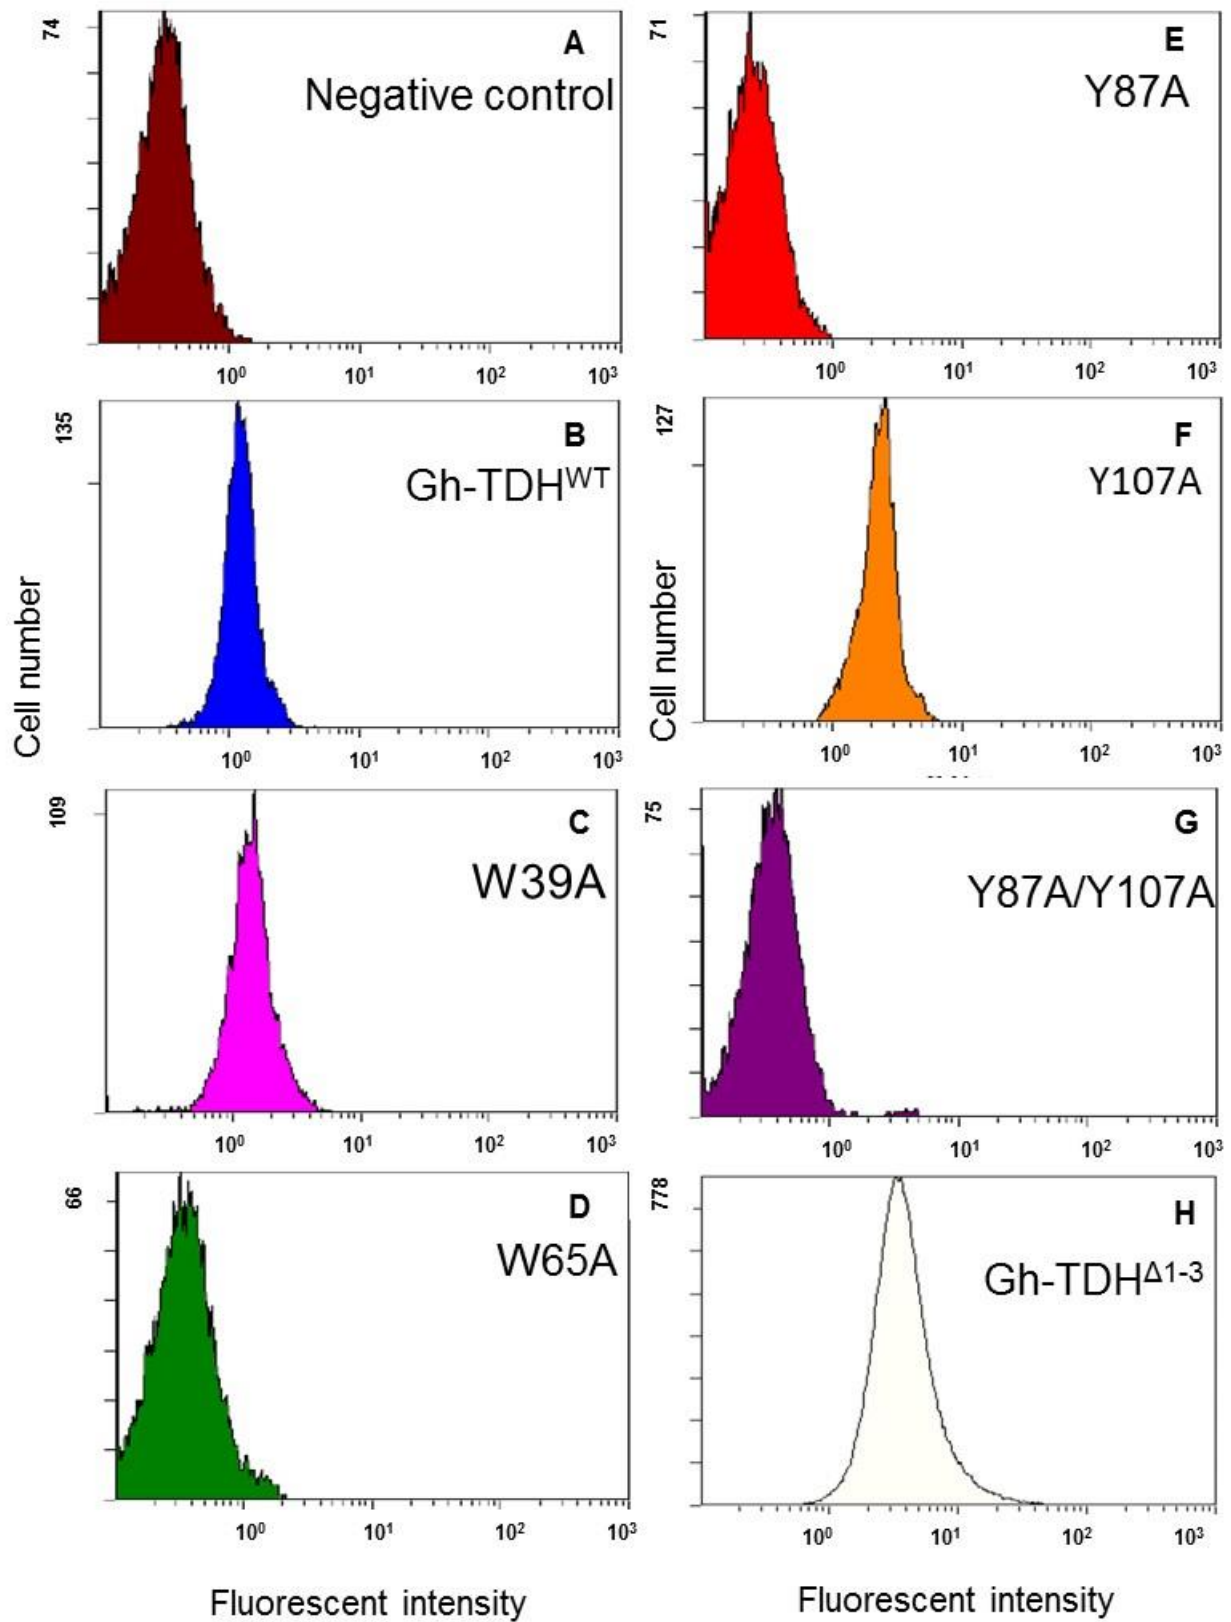

**Fig. S4A.** Illustrations of the analysis of the topology of Gh-TDH Oligomer-I, -II, and -III using program CAVER<sup>50</sup>. The narrowest part of the side-channels were marked with measurements.

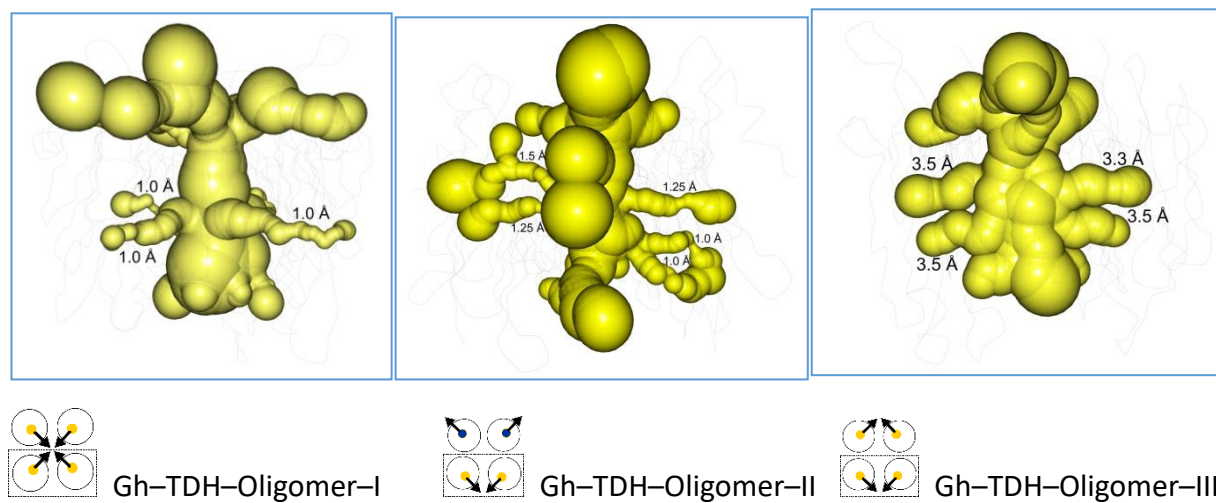

**Fig. S4B.** Top-view of Oligomer-I from the *N*-terminus direction and of Oligomer-II and -III.

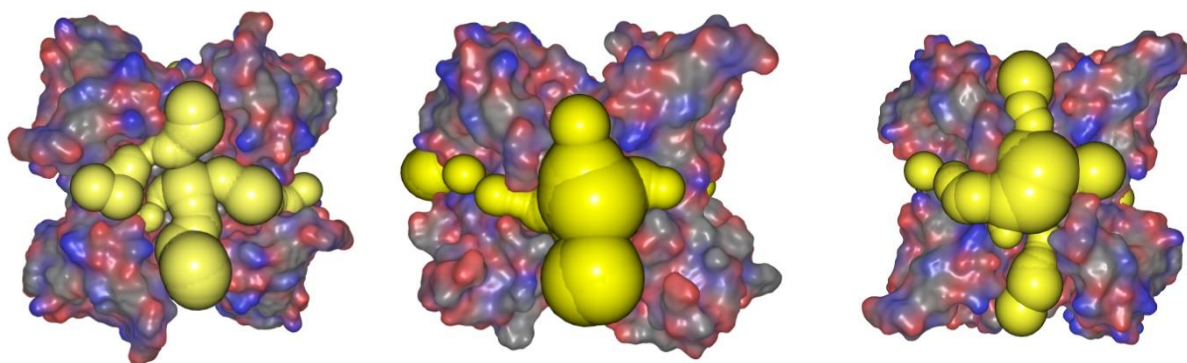

**Figure S4C.** Bottom-view of Gh-TDH Oligomer-I from the *C*-terminus direction and of Oligomer-II and -III.

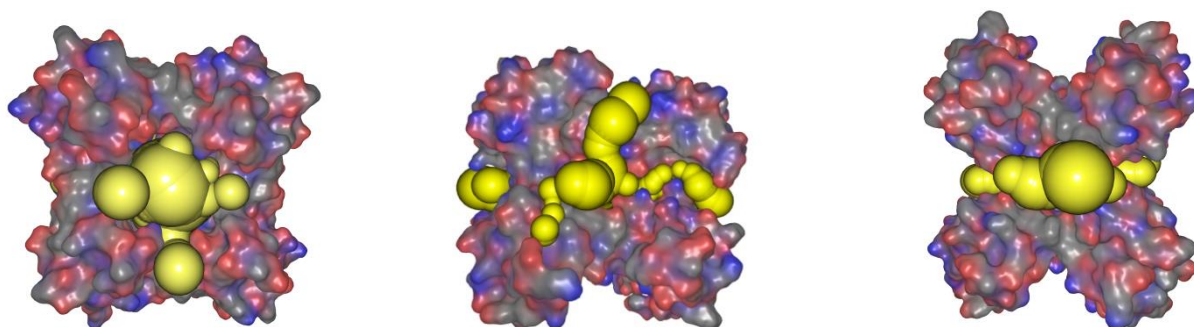

**Fig. S5.** Sequence alignment of Vp-TDH and Gh-TDH.

```

G.hollisae_TDH          FELPSIPFPPSPGSDEILFVVRDITTFNTKEPVNVKVSDFWTNRNVKRKPYK 50
V.parahaemolyticus_TDH2 FELPSVFPFPAPGSDEILFVVRDITTFNTNAPVNVVEVSDFWTNRNVKRKPYK 50
*****:***:*****:*****: *****:*****:*****

G.hollisae_TDH          DVYGQSVFTTSGSKWLTSYMTVSINNKDYTMAAVSGYKDGFSVSVFKSGQ 100
V.parahaemolyticus_TDH2 DVYGQSVFTTSGTKWLTSYMTVNINDKDYTMAAVSGYKKGHSVAVFKSDQ 100
*****:*****:*****:*****:*****:*****:*****

G.hollisae_TDH          IQLQHYYNSVADFVGGDENSIIPSKTYLDETPEYFVNVEAYESGSGNILVM 150
V.parahaemolyticus_TDH2 VQLQHSYDSVANFVGEDEDSIIPSKMYLDETPEYFVNVEAYESGSGNILVM 150
:**** *:***:*** **:***** *****:*****:*****

G.hollisae_TDH          CISNKESYFECESQQ 165
V.parahaemolyticus_TDH2 CISNKESFFECKHQQ 165
*****:***: **

```

**Fig. S6.** Analytical ultracentrifugation analysis (AUC) results of Gh-TDH<sup>WT</sup> and various Gh-TDH<sup>mut</sup> proteins. (A) Gh-TDH<sup>WT</sup>; (B) Gh-TDH<sup>Y53D</sup>; (C) Gh-TDH<sup>F159D</sup>; (D) Gh-TDH<sup>R46E</sup>; (E) Gh-TDH<sup>Y53D/F159D</sup>; (F) Gh-TDH<sup>D78A</sup>; (G) Gh-TDH<sup>K97A</sup>; (H) Gh-TDH<sup>N108A</sup>.

**(A) Gh-TDH<sup>WT</sup>**

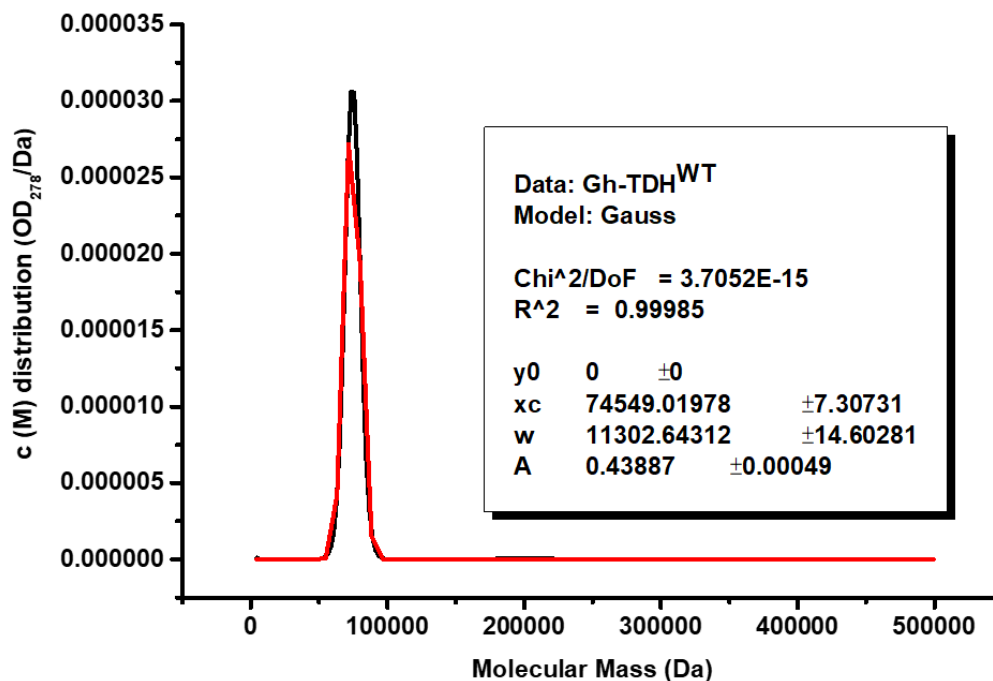

**(B) Gh-TDH<sup>Y53D</sup>**

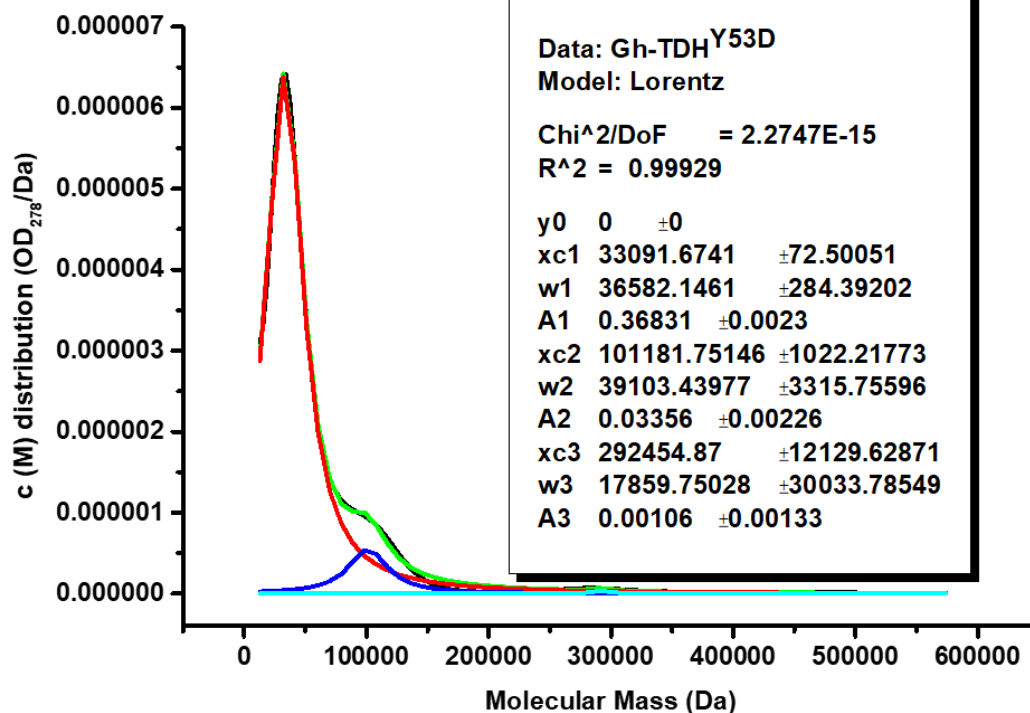



(C) Gh-TDHF<sup>F159D</sup>

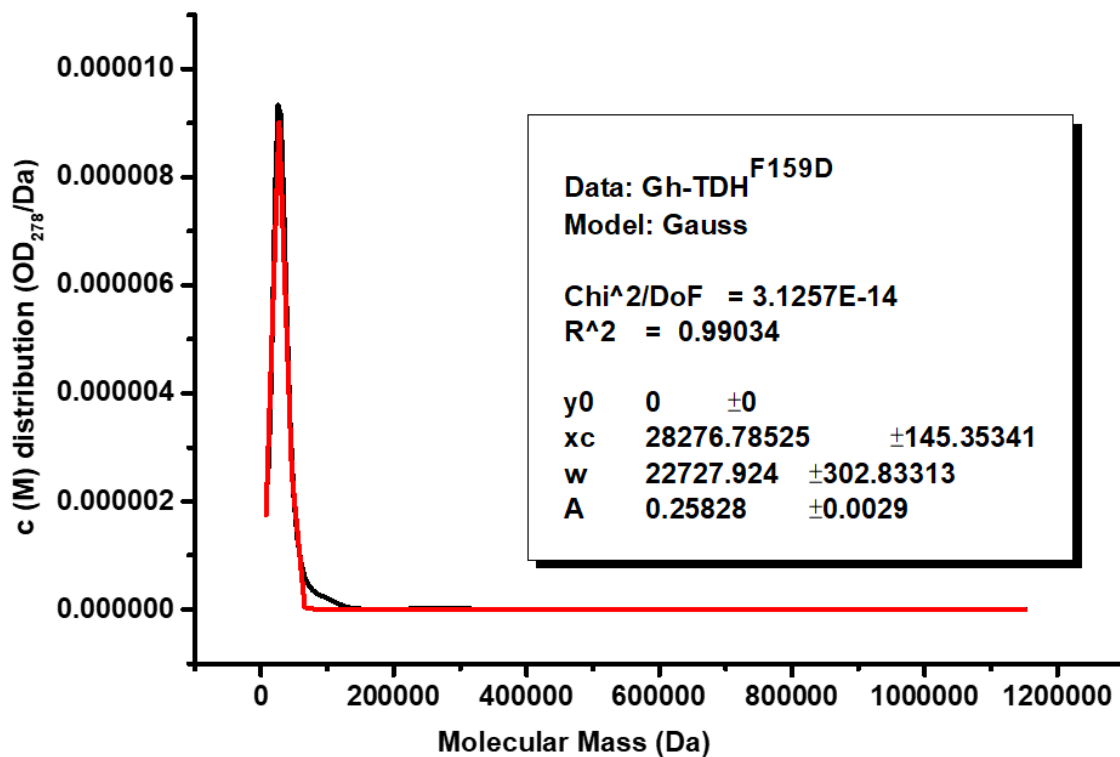

(D) Gh-TDHR<sup>R46E</sup>

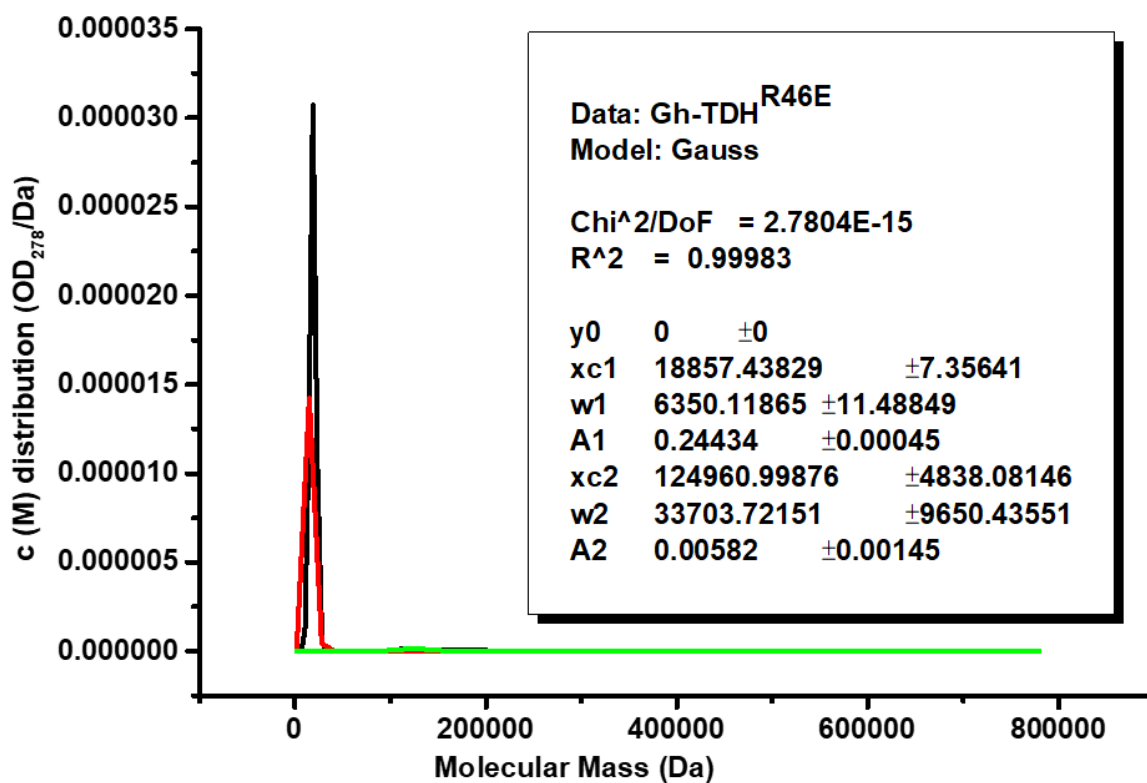

(E) Gh-TDH<sup>Y53D/F159D</sup>

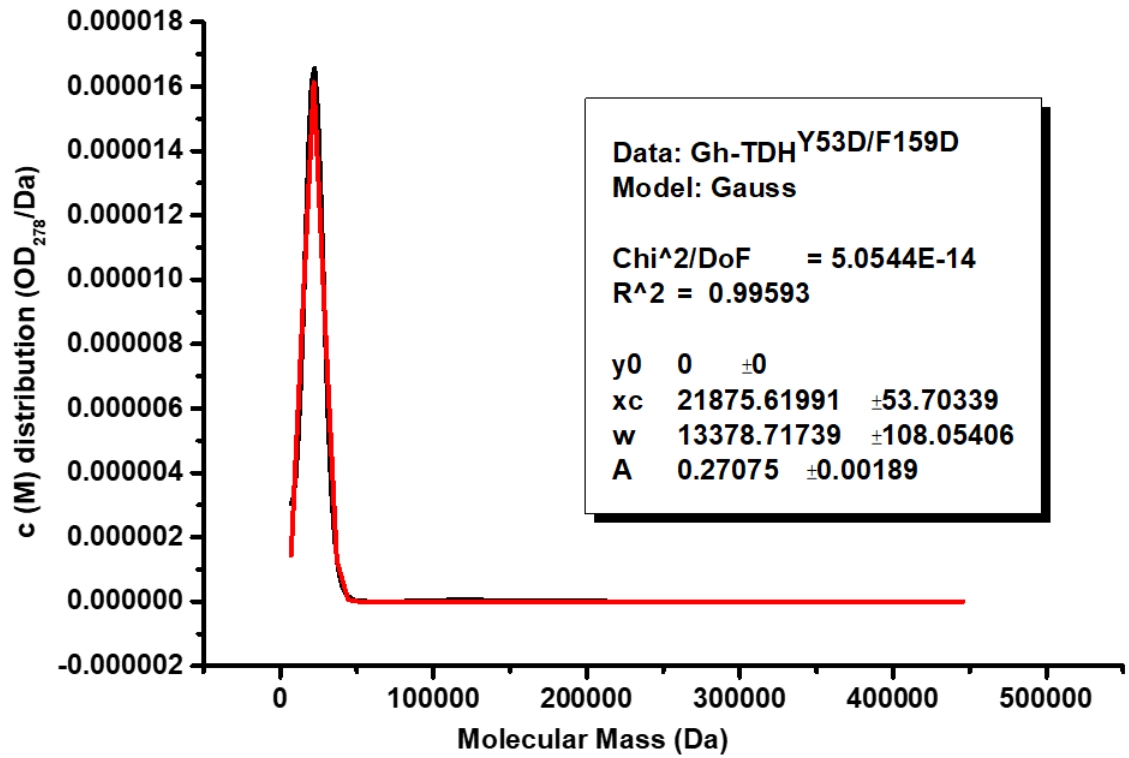

(F) Gh-TDH<sup>D78A</sup>

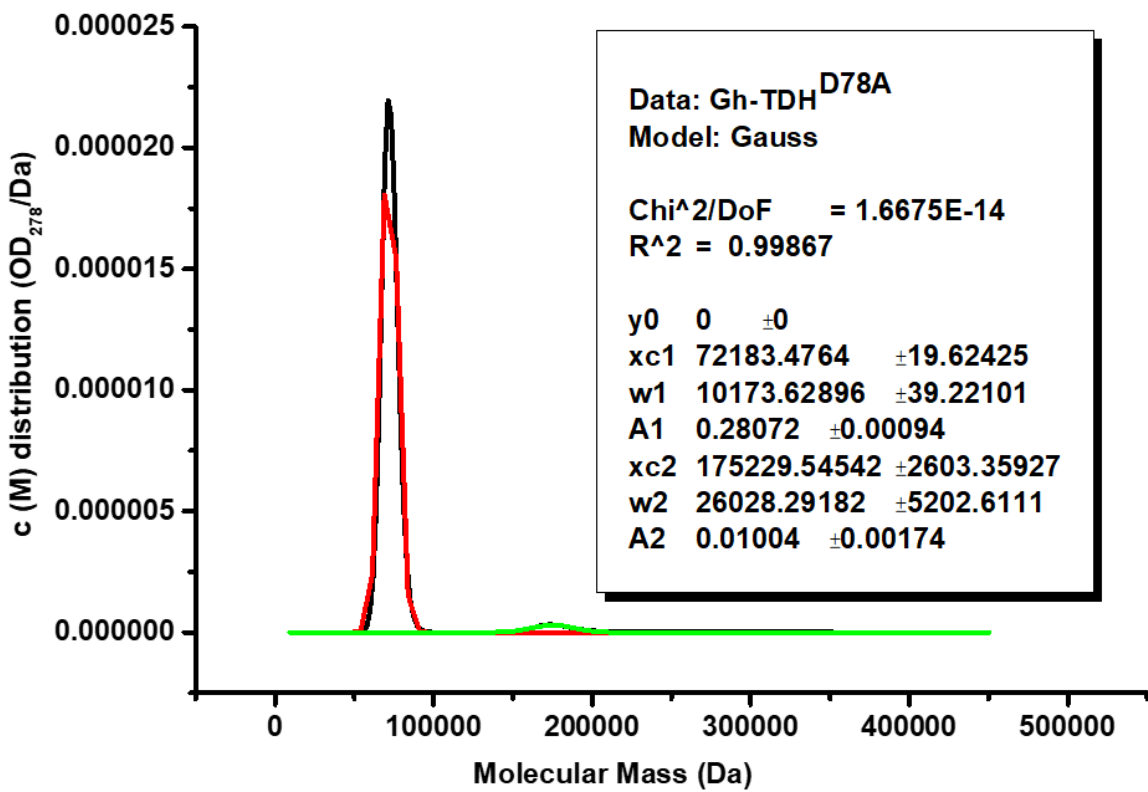

(G) Gh-TDH<sup>K97A</sup>

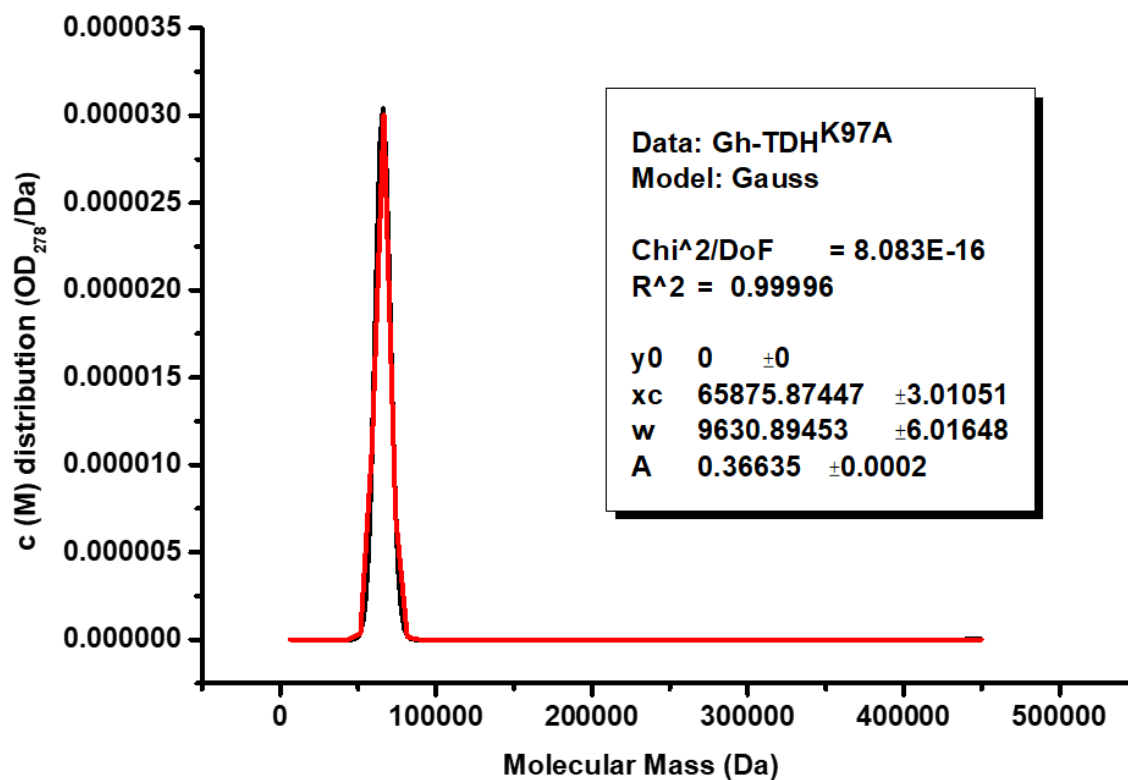

(H) Gh-TDH<sup>N108A</sup>

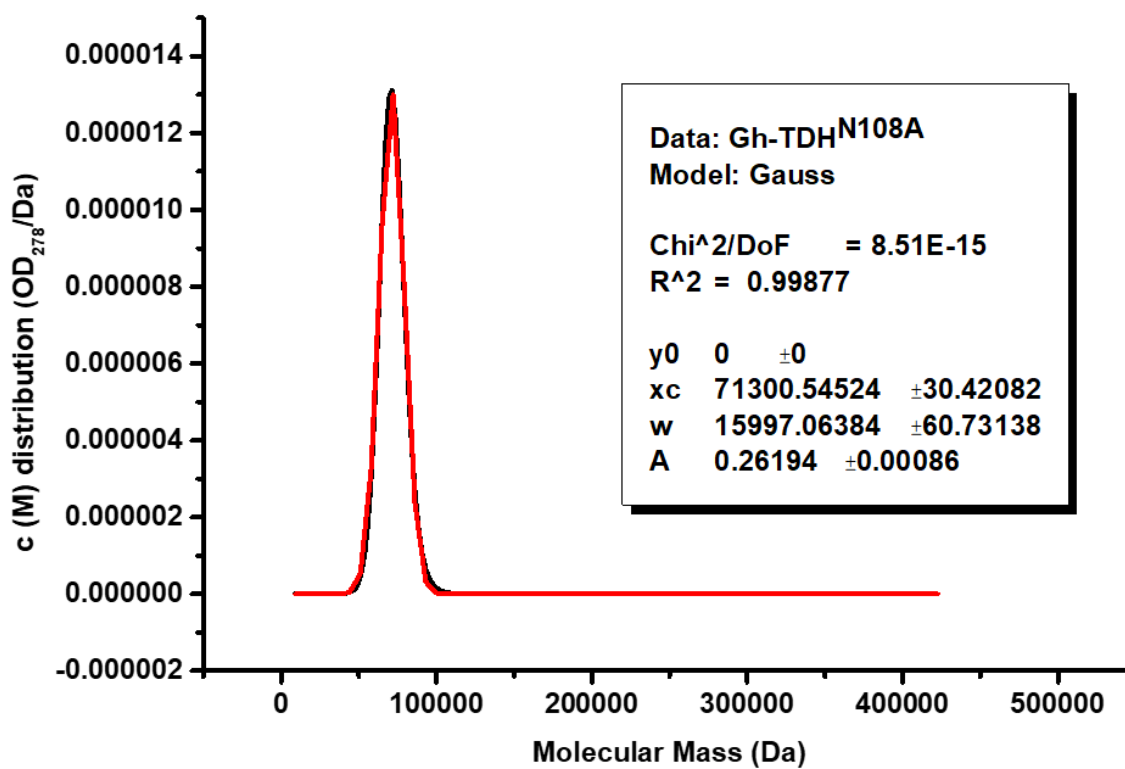

**Table S1**

| MAD data <sup>a</sup>                                            | Gh-TDH-I oligomer                  |              |              | Gh-TDH-II oligomer                 |              |              |
|------------------------------------------------------------------|------------------------------------|--------------|--------------|------------------------------------|--------------|--------------|
|                                                                  | peak                               | inflection   | remote       | peak                               | inflection   | remote       |
| space group                                                      | P2 <sub>1</sub> 2 <sub>1</sub> 2   |              |              | P2 <sub>1</sub> 2 <sub>1</sub> 2   |              |              |
| cell dimension (Å)                                               | 105.3, 112.6, 60.8                 |              |              | 105.3, 112.7, 60.9                 |              |              |
|                                                                  | $\alpha, \beta, \gamma = 90^\circ$ |              |              | $\alpha, \beta, \gamma = 90^\circ$ |              |              |
| wavelength                                                       | 0.9789                             | 0.9791       | 0.9639       | 0.9790                             | 0.9792       | 0.9638       |
| resolution (Å)                                                   | 30-1.79                            | 50-1.79      | 30-1.70      | 30-2.30                            | 30-2.30      | 30-2.40      |
|                                                                  | (1.73-1.79)                        | (1.73-1.79)  | (1.70-1.76)  | (2.38-2.30)                        | (2.38-2.30)  | (2.38-2.40)  |
| total reflections                                                | 700,387                            | 345,485      | 359,546      | 263,840                            | 132,647      | 133,719      |
| unique reflection                                                | 71,759                             | 70,365       | 73,925       | 32,500                             | 32,652       | 32,462       |
| R <sub>merge</sub>                                               | 0.077(0.597)                       | 0.073(0.643) | 0.064(0.570) | 0.083(0.264)                       | 0.080(0.226) | 0.068(0.222) |
| redundancy                                                       | 9.8 (8.7) <sup>b</sup>             | 4.9 (4.3)    | 4.9 (4.1)    | 8.1 (7.2)                          | 4.1 (3.7)    | 4.1 (3.8)    |
| I/ $\sigma$ (I)                                                  | 5.1 (4.8)                          | 4.2 (4.1)    | 4.3 (4.5)    | 21.8 (6.7)                         | 14.2 (5.9)   | 17.0 (6.3)   |
| data completeness (%)                                            | 94.4 (93.6)                        | 92.4 (82.5)  | 92.2 (79.3)  | 99.6 (97.9)                        | 99.5 (97.4)  | 99.5 (98.3)  |
| refinement statics                                               |                                    |              |              |                                    |              |              |
| resolution (Å)                                                   | 23.85 – 1.70                       |              |              | 26.77 – 2.30                       |              |              |
| No. reflections                                                  | 71,897                             |              |              | 32,609                             |              |              |
| R <sub>work</sub> /R <sub>free</sub> (%)                         | 20.11 / 23.36                      |              |              | 19.34 / 24.07                      |              |              |
| protein atoms                                                    | 4,817                              |              |              | 4,854                              |              |              |
| waters                                                           | 240                                |              |              | 184                                |              |              |
| B <sub>factor</sub> (Å <sup>2</sup> )                            |                                    |              |              |                                    |              |              |
| protein                                                          | 26.935                             |              |              | 31.334                             |              |              |
| water                                                            | 29.428                             |              |              | 32.134                             |              |              |
| R.M.S. deviation (Å)                                             |                                    |              |              |                                    |              |              |
| bond lengths (Å)                                                 | 0.005                              |              |              | 0.007                              |              |              |
| bond angles (°)                                                  | 0.847                              |              |              | 1.008                              |              |              |
| Ramachandran favored (%)                                         | 96.6%                              |              |              | 97.25%                             |              |              |
| MolProbity score <sup>e</sup> (100 <sup>th</sup> percentile)     | 0.87                               |              |              | 0.95                               |              |              |
| All-atom clash score <sup>f</sup> (100 <sup>th</sup> percentile) | 0.43                               |              |              | 1.06                               |              |              |

a. The multiple anomalous dispersion (MAD) X-ray diffraction data were named based on the Gh-TDH tetrameric structure determined in the crystallographic asymmetric unit.

b. Values in parentheses are parameters for high-resolution shell.

c.  $R_{\text{merge}} = \sum_{hkl} (\sum_i (|I_{hkl,i} - \langle I_{hkl} \rangle|)) / \sum_{hkl,i} \langle I_{hkl} \rangle$ , where  $I_{hkl,i}$  is the intensity of the reflection with Miller indices  $h, k$  and  $l$ , and  $\langle I_{hkl} \rangle$  is the mean intensity of the reflection.

d.  $R_{\text{work}} = \sum_{hkl} (| |F_{\text{obs}}| - |F_{\text{calc}}| |) / |F_{\text{obs}}|$ , where  $|F_{\text{obs}}|$  and  $|F_{\text{calc}}|$  are the observed and calculated structure factor amplitudes.  $R_{\text{free}}$  is calculated with statistically selected ~2000 reflections omitted from the refinement process.

e. MolProbity score is defined as the following:

$$0.42574 * \log(1 + \text{clashscore}) + 0.32996 * \log(1 + \max(0, \text{pctRotOut} - 1)) + 0.24979 * \log(1 + \max(0, 100 - \text{pctRamaFavored} - 2)) + 0.5$$

100<sup>th</sup> percentile is the best among structures of comparable resolution; 0<sup>th</sup> percentile is the worst.

f. The clashscore is the number of serious overlaps of non-donor-acceptor atoms by more than 0.4 Å per 1000 atoms.

**Table S2.** Molecular mass determination of Gh-TDH<sup>WT</sup> and various Gh-TDH<sup>mut</sup> proteins.

| Mw.<br>(kDa)    | WT               | Y53D            | F159D           | R46E             | Y53D/<br>F159D  | D78A            | K97A             | S98A  | Q104A | N108A           | Y126A | E129A |
|-----------------|------------------|-----------------|-----------------|------------------|-----------------|-----------------|------------------|-------|-------|-----------------|-------|-------|
| SDS<br>PAGE     | 22               | 22              | 22              | 22               | 22              | 22              | 22               | 22    | 22    | 22              | 22    | 22    |
| Native-<br>PAGE | 90~140           | 72              | 72              | 66               | 66              | 90~140          | 70~95            | 70~95 | 70~95 | 70~95           | 70~95 | 70~95 |
| AUC             | 74.54<br>± 0.007 | 33.09<br>± 0.07 | 28.28<br>± 0.15 | 18.86<br>± 0.007 | 21.88<br>± 0.05 | 72.18<br>± 0.02 | 65.88<br>± 0.003 | N.D.  | N.D.  | 71.30<br>± 0.03 | N.D.  | N.D.  |

N. D. = not determined
